# Supplementary material for: An ultrasensitive luminescent nanothermometer in the first biological window based on phonon-assisted thermal enhancing and thermal quenching
Source: Royal Society of Chemistry journal article supplement (doi:10.1039/d0tc04082g), 2020-01-01
Supplement: d0tc04082g1.pdf [file d0tc04082g1.pdf]

## Supporting Information

### **Ultrasensitive luminescent nanothermometer in first biological window based on phonon-assisted thermal enhancing and thermal quenching**

*Mochen Jia<sup>a</sup>, Zhen Sun<sup>a</sup>, Hanyu Xu<sup>a</sup>, Xiaoyang Jin<sup>a</sup>, Ziqian Lv<sup>a</sup>, Tianqi Sheng<sup>b</sup> and Zuoling Fu<sup>\*a</sup>*

<sup>a</sup>Coherent Light and Atomic and Molecular Spectroscopy Laboratory, Key Laboratory of Physics and Technology for Advanced Batteries, College of Physics, Jilin University, Changchun 130012, China

<sup>b</sup>Zhong Sheng (Shen Zhen) Medical Equipment Science and Technology Co., Ltd., Shenzhen, Guangdong, China

\*zlfu@jlu.edu.cn

## Experimental section

**Chemicals.**  $\text{Ln}(\text{NO}_3)_3$  stock solutions were prepared by dissolving  $\text{Yb}_2\text{O}_3$  (99.99%, Aladdin),  $\text{Tm}_2\text{O}_3$  (99.99%, Aladdin) and  $\text{Er}_2\text{O}_3$  (99.99%, Aladdin) into hot nitric acid in stoichiometric proportions.  $\text{Na}_2\text{MoO}_4$  (99%),  $\text{YbCl}_3 \cdot 6\text{H}_2\text{O}$  (99.99%),  $\text{TmCl}_3 \cdot 6\text{H}_2\text{O}$  (99.99%) and  $(\text{NH}_4)_2\text{HPO}_4$  (99%) were purchased from Beijing HWRK Chem Co., LTD.

**Sample Preparation.**  $\text{NaYb}(\text{MoO}_4)_2: x\text{Tm}^{3+}$  nanosheets were synthesized by hydrothermal method with further calcination. The stoichiometric amounts of  $\text{Ln}(\text{NO}_3)_3$  stock solutions were dissolved in the appropriate amount of deionized water. Next, the stoichiometric amounts of  $\text{Na}_2\text{MoO}_4$  with  $\text{Ln}(\text{NO}_3)_3/\text{Na}_2\text{MoO}_4=1/3$  were dissolved in the appropriate amount of deionized water and dropped into the above solution. The pH of the mixed solution was adjusted to 5 with diluent nitric acid and sodium hydroxide to form a white colloidal solution and stirred for 1 h. Then the mixture was transferred into a Teflon-lined stainless steel autoclave, and maintained at 180 °C for 24 h. The precipitates were obtained by centrifugation and washed with deionized water and ethanol. After drying at 60 °C for 10 h, the nanosheets were obtained by calcining the precipitates at 600 °C for 6 h. The synthesis of  $\text{NaYb}(\text{MoO}_4)_2: 5\%\text{Er}^{3+}$  sample was similar except that  $\text{Er}(\text{NO}_3)_3$  stock solution was required.

$\text{YbPO}_4: 1\%\text{Tm}^{3+}$  nanoparticles were synthesized by the coprecipitation method with further calcination. The lanthanide chlorides ( $\text{YbCl}_3 \cdot 6\text{H}_2\text{O}$  and  $\text{TmCl}_3 \cdot 6\text{H}_2\text{O}$ ) were stoichiometrically dissolved in appropriate amount of deionized water. Then the stoichiometric amounts of  $(\text{NH}_4)_2\text{HPO}_4$  dissolved in appropriate amount of deionized

water were dropped into the above solution and stirred for 7 h. The precursors were obtained by centrifugation and washed with deionized water and ethanol, and then dried at 70 °C for 10 h. Finally, the dried precursors were calcined in air at 1200 °C for 2 h to yield the final nanoparticles.

**Cytotoxicity assay.** A standard MTT assay was utilized to assess the cytotoxicity of NaYb(MoO<sub>4</sub>)<sub>2</sub>: 1%Tm<sup>3+</sup> sample in Hela cells. The cells were incubated for 24 h with 5% CO<sub>2</sub> at 37 °C to attach them to the wells. Then the sample was introduced into the wells and incubated for another 24 h with a set series of concentrations.

**Characterization Techniques.** The crystallographic phases of all samples were determined by XRD patterns on a Bruker D8 Focus diffractometer equipped with Cu K $\alpha$  radiation ( $\lambda = 0.15405$  nm). The morphologies were studied via a field emission scanning electron microscope (SEM, Philips XL30) and a transmission electron microscope (TEM, JEM-2200FS). The Fourier transform infrared spectra were collected by a Bruker TENSOR 27 FT-IR spectrometer. The luminescence spectra were collected by an Andor SR-500i spectrometer (Andor Technology Co, Belfast, U.K.) equipped with a SR830 DSP lock-in amplifier and a CCD detector under the excitation of a 980 nm diode laser. The temperature evolution emission spectra of samples were obtained with the assistance of a copper-constant thermocouple and temperature control system (TAP-02, orient-KOJI). The absorption spectra were measured with a Shimadzu UV-3101PC scanning spectrophotometer. The quantum yield was measured on a fluorescence spectrometer (FLS1000, Edinburgh) equipped with an integrating sphere under the excitation of 980 nm (5 W/cm<sup>2</sup>).

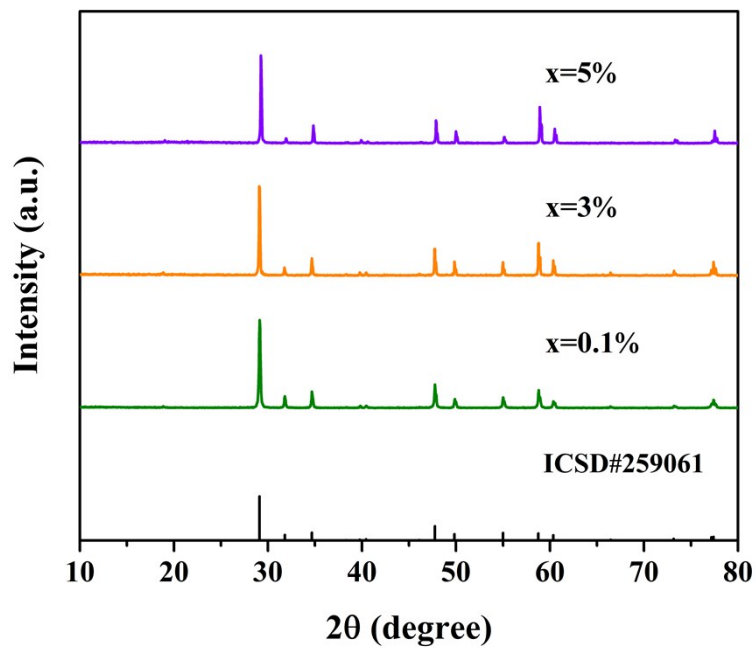

Figure S1. The XRD patterns of  $\text{NaYb}(\text{MoO}_4)_2: x\text{Tm}^{3+}$  samples.

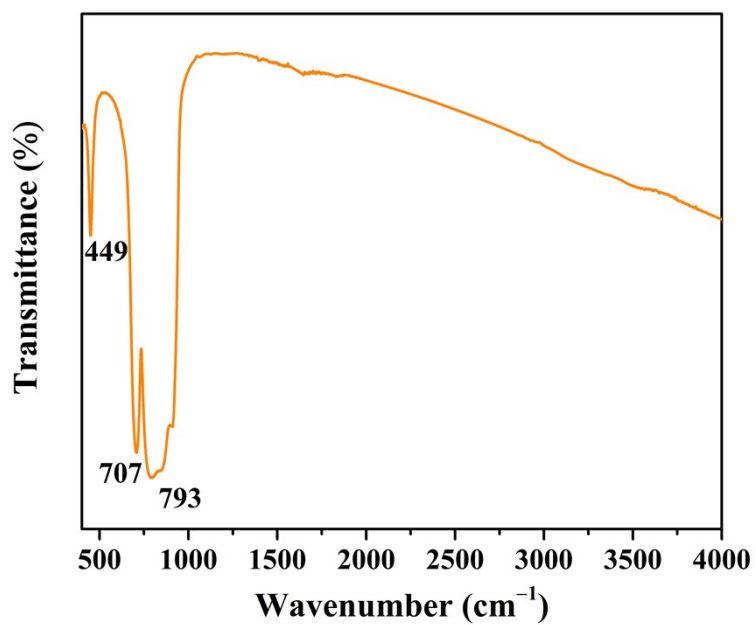

Figure S2. The Fourier transform infrared spectrum of  $\text{NaYb}(\text{MoO}_4)_2: 1\%\text{Tm}^{3+}$  nanosheets.

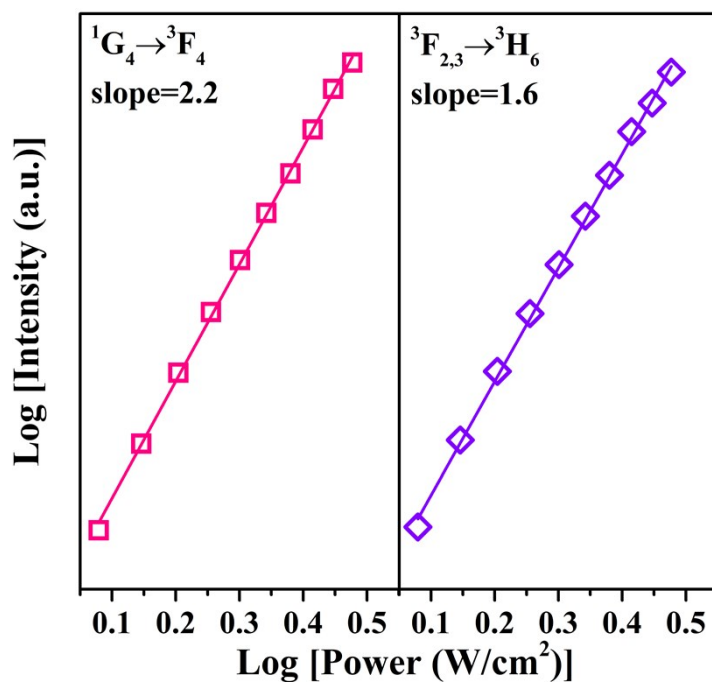

Figure S3. Double-log intensity-power slopes of  ${}^1G_4 \rightarrow {}^3F_4$  and  ${}^3F_{2,3} \rightarrow {}^3H_6$  transitions for  $\text{NaYb}(\text{MoO}_4)_2$ : 1% $\text{Tm}^{3+}$  nanosheets.

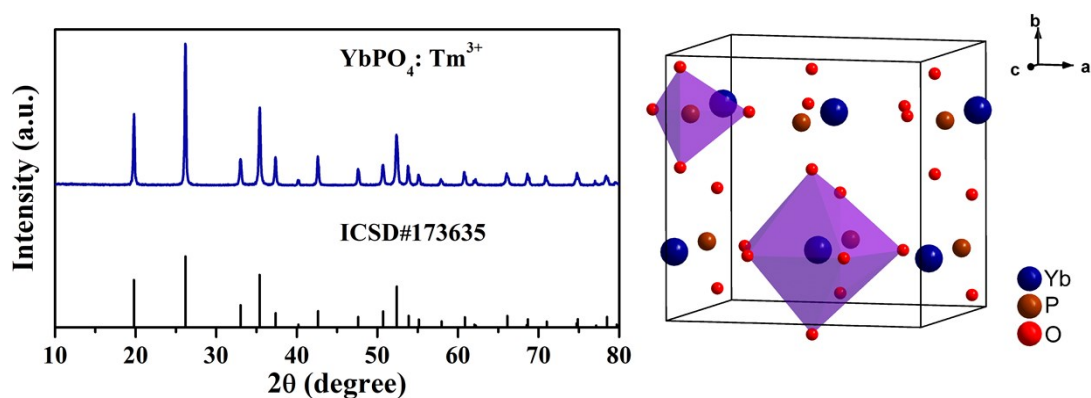

Figure S4. The XRD pattern of  $\text{YbPO}_4$ : 1% $\text{Tm}^{3+}$  sample, and the schematic crystal structure of tetragonal phase  $\text{YbPO}_4$ .

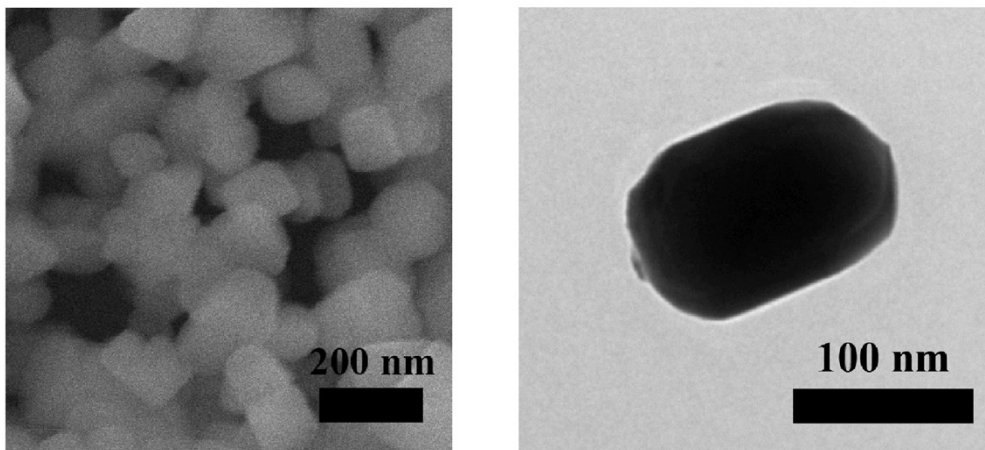

Figure S5. The SEM and TEM images of  $\text{YbPO}_4: 1\% \text{Tm}^{3+}$  nanoparticles.

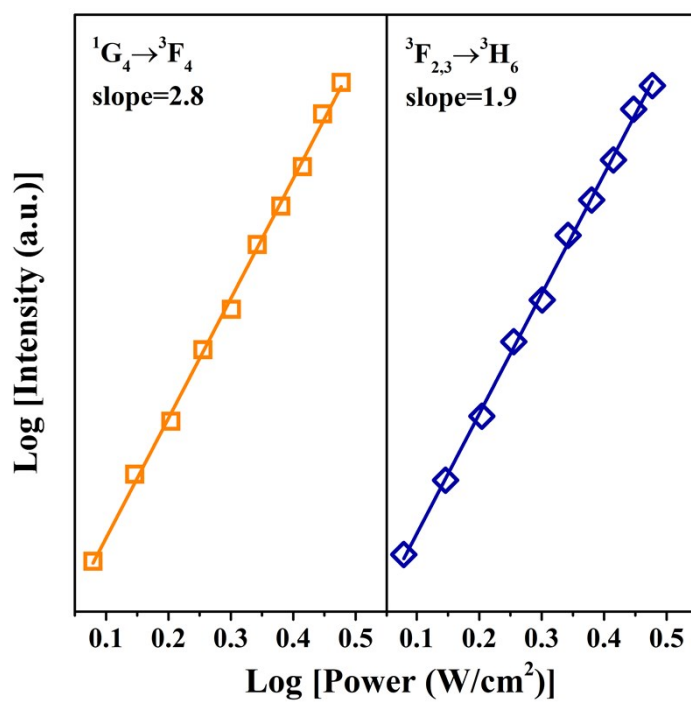

Figure S6. Double-log intensity-power slopes of  $^1\text{G}_4 \rightarrow ^3\text{F}_4$  and  $^3\text{F}_{2,3} \rightarrow ^3\text{H}_6$  transitions for  $\text{YbPO}_4: 1\% \text{Tm}^{3+}$  nanoparticles.

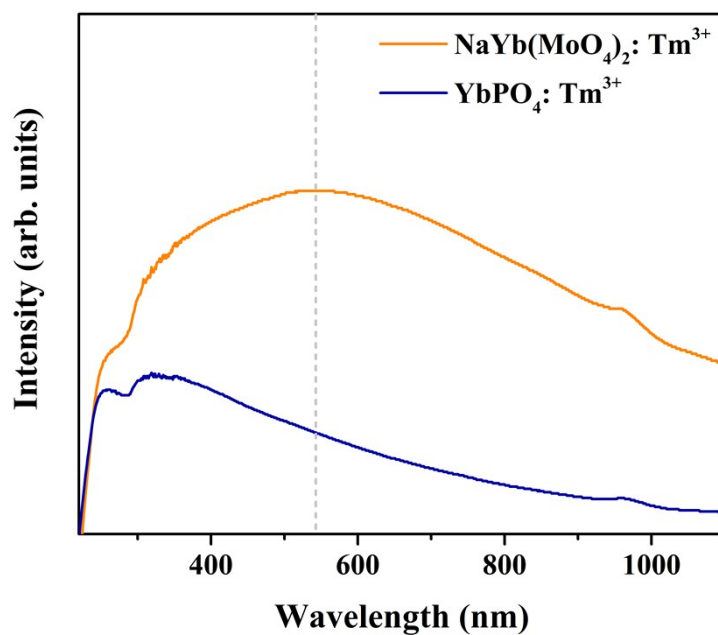

Figure S7. The absorption spectra of aqueous suspensions of NaYb(MoO<sub>4</sub>)<sub>2</sub>: 1%Tm<sup>3+</sup> and YbPO<sub>4</sub>: 1%Tm<sup>3+</sup> samples.

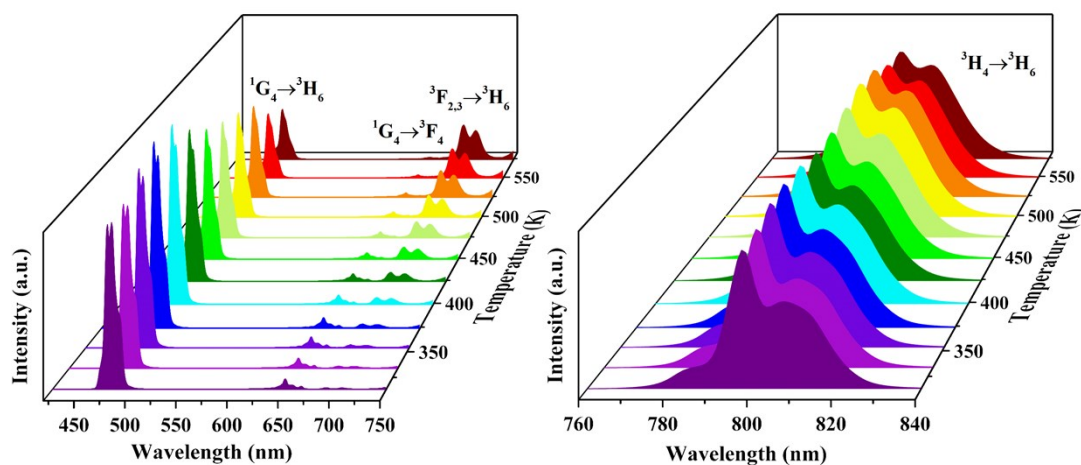

Figure S8. The temperature evolution emission spectra in the 313–573 K range of NaYb(MoO<sub>4</sub>)<sub>2</sub>: 1%Tm<sup>3+</sup> nanosheets.

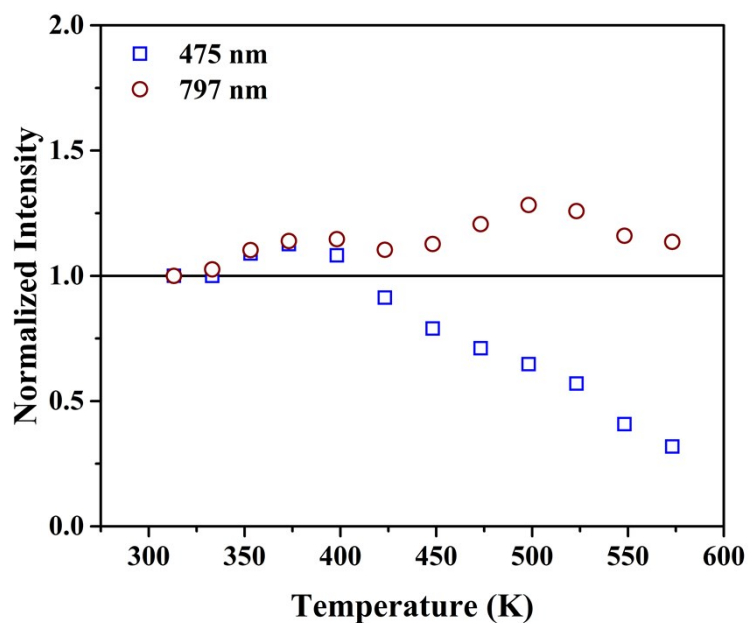

Figure S9. The normalized integrated intensities with temperature of corresponding transitions for NaYb(MoO<sub>4</sub>)<sub>2</sub>: 1%Tm<sup>3+</sup> nanosheets.

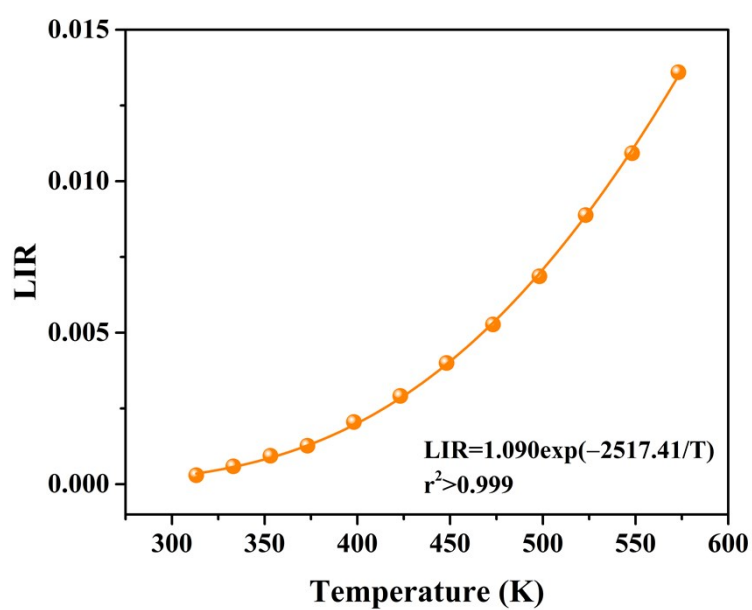

Figure S10. The thermally coupled thermometry based on <sup>3</sup>F<sub>2,3</sub> and <sup>3</sup>H<sub>4</sub> levels of NaYb(MoO<sub>4</sub>)<sub>2</sub>: 1%Tm<sup>3+</sup> nanosheets.



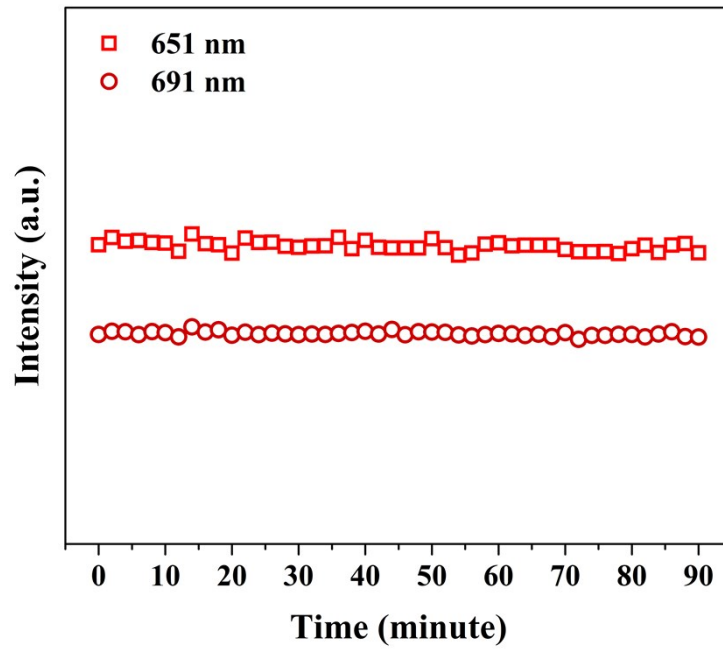

Figure S11. The time-dependent integrated intensities of  ${}^1G_4 \rightarrow {}^3F_4$  and  ${}^3F_{2,3} \rightarrow {}^3H_6$  emissions of  $\text{NaYb}(\text{MoO}_4)_2: 1\% \text{Tm}^{3+}$  nanosheets at 373 K.

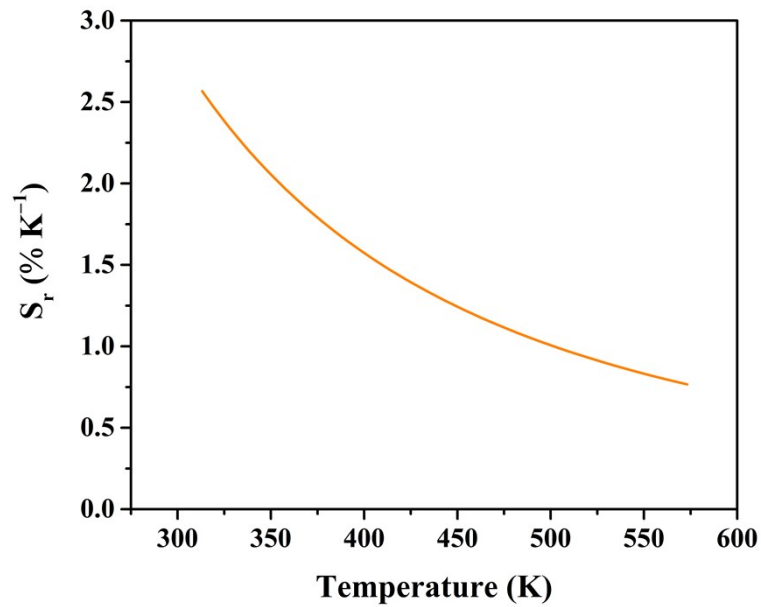

Figure S12. The  $S_r$  of thermally coupled thermometry based on  ${}^3F_{2,3}$  and  ${}^3H_4$  levels of  $\text{NaYb}(\text{MoO}_4)_2: 1\% \text{Tm}^{3+}$  nanosheets.

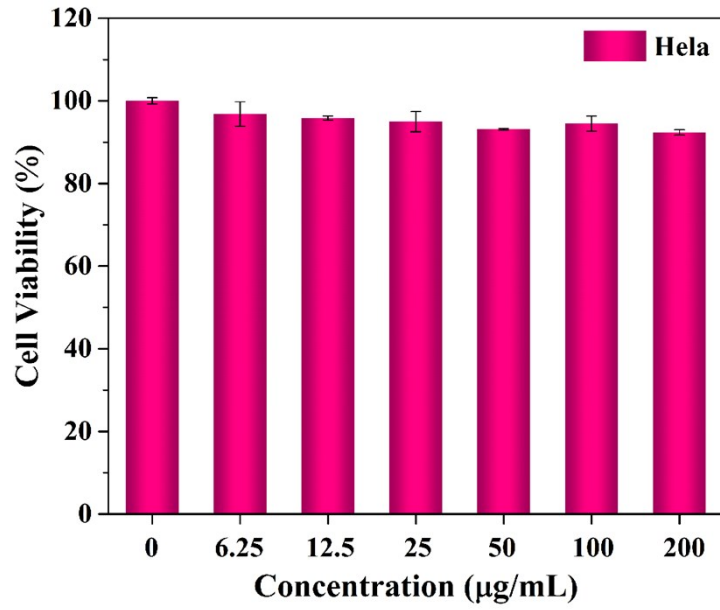

Figure S13. The cell viabilities of HeLa cells incubated with different concentrations of NaYb(MoO<sub>4</sub>)<sub>2</sub>: 1%Tm<sup>3+</sup> sample for 24 h.

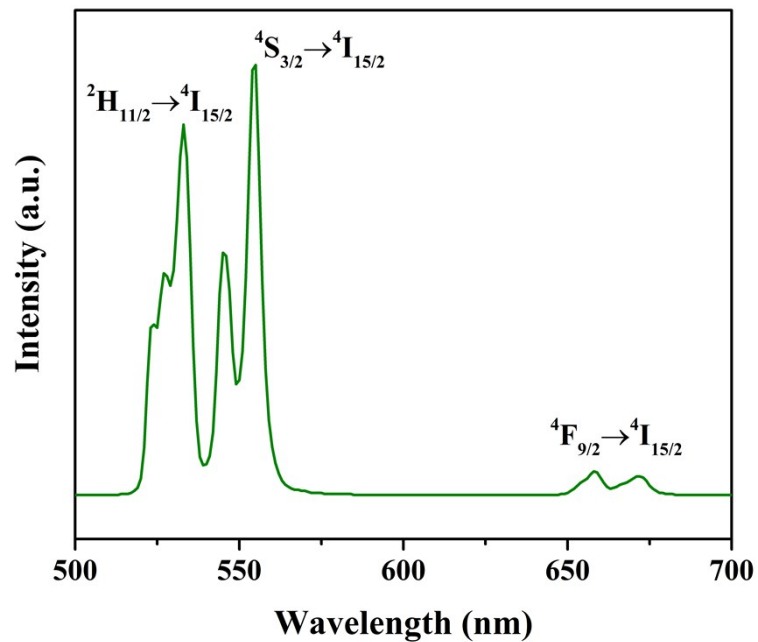

Figure S14. The emission spectrum of NaYb(MoO<sub>4</sub>)<sub>2</sub>: 5%Er<sup>3+</sup> nanosheets under the 980 nm excitation.

Table S1. The fitting parameters of calibration curve for NaYb(MoO<sub>4</sub>)<sub>2</sub>: 1%Tm<sup>3+</sup> nanosheets.

| Parameter | Value          | r <sup>2</sup> |
|-----------|----------------|----------------|
| a         | -0.4078±0.0380 |                |
| b         | 0.0061±0.0003  | 0.99994        |
| c         | 70.48±0.47     |                |

Table S2. The fitting parameters of power-dependent *LIR* values at different temperature of NaYb(MoO<sub>4</sub>)<sub>2</sub>: 1%Tm<sup>3+</sup> nanothermometers.

| Temperature (K) | e             | Δn             | r <sup>2</sup> |
|-----------------|---------------|----------------|----------------|
| 333             | 0.6413±0.0035 | -0.6570±0.0083 | 0.9987         |
| 373             | 1.3367±0.0060 | -0.6340±0.0068 | 0.9991         |
| 423             | 3.3129±0.0278 | -0.5190±0.0123 | 0.9954         |
